# Supplementary material for: Interannual variability of the atmospheric CO 2 growth rate: roles of precipitation and temperature
Source: Copernicus journal article supplement (doi:10.5194/bg-13-2339-2016), 2016-04-21
Supplement: Supplementary file 5 [file bg-13-2339-2016-supplement.zip]

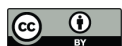

## *Supplement of*

# **Interannual variability of the atmospheric CO<sub>2</sub> growth rate: roles of precipitation and temperature**

**Jun Wang et al.**

*Correspondence to:* Jun Wang (wangjun@nju.edu.cn)

- bg-13-2339-2016-supplement-title-page.pdf
- Supplementary
  - Supporting Figures.docx
  - figS1.pdf
  - figS2.pdf
  - figS3.pdf
  - figS4.pdf
  - figS5.pdf
  - figS6.pdf

The copyright of individual parts of the supplement might differ from the CC-BY 3.0 licence.
