# Supplementary figures and images for: Interannual variability of the atmospheric CO 2 growth rate: roles of precipitation and temperature
Source: Copernicus journal article supplement (doi:10.5194/bg-13-2339-2016), 2016-04-21

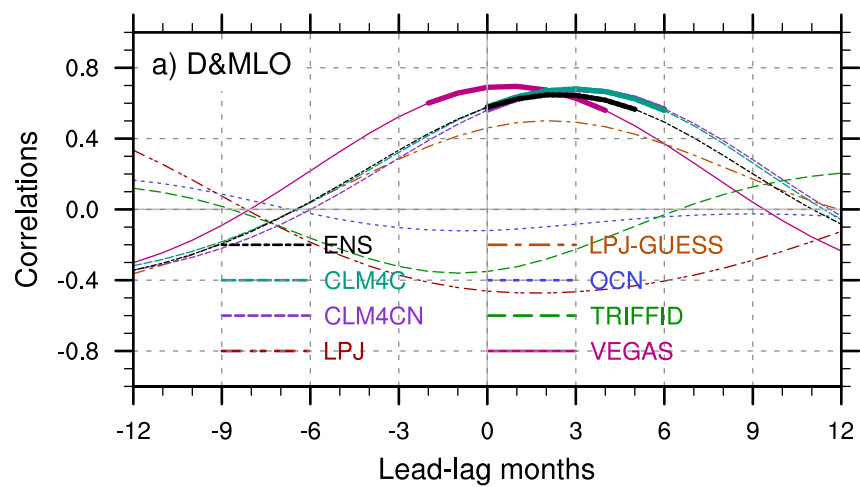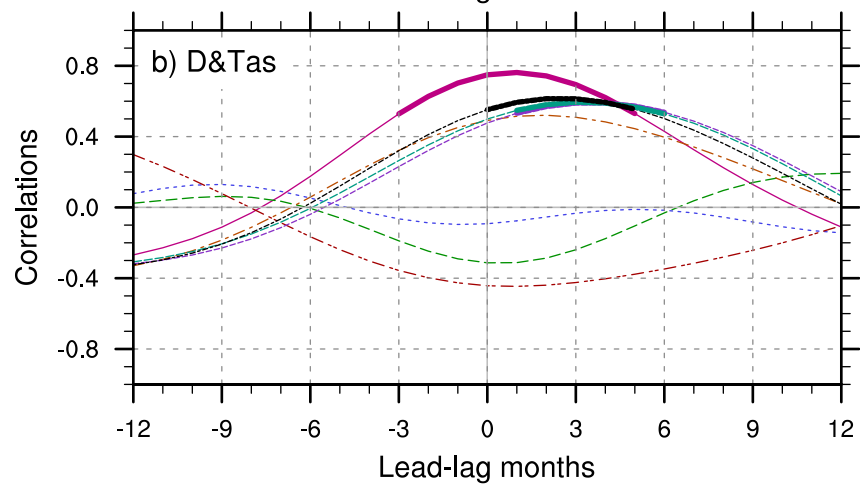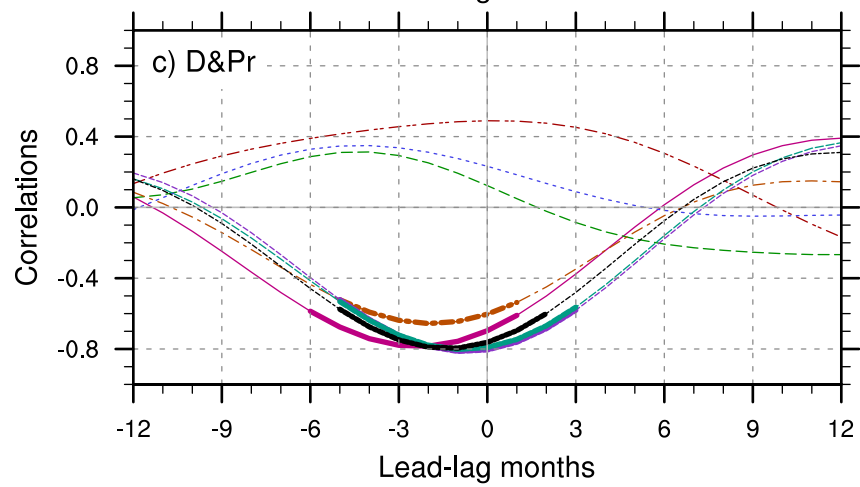

Supplement: Supplementary file 1 [file bg-13-2339-2016-supplement.zip]

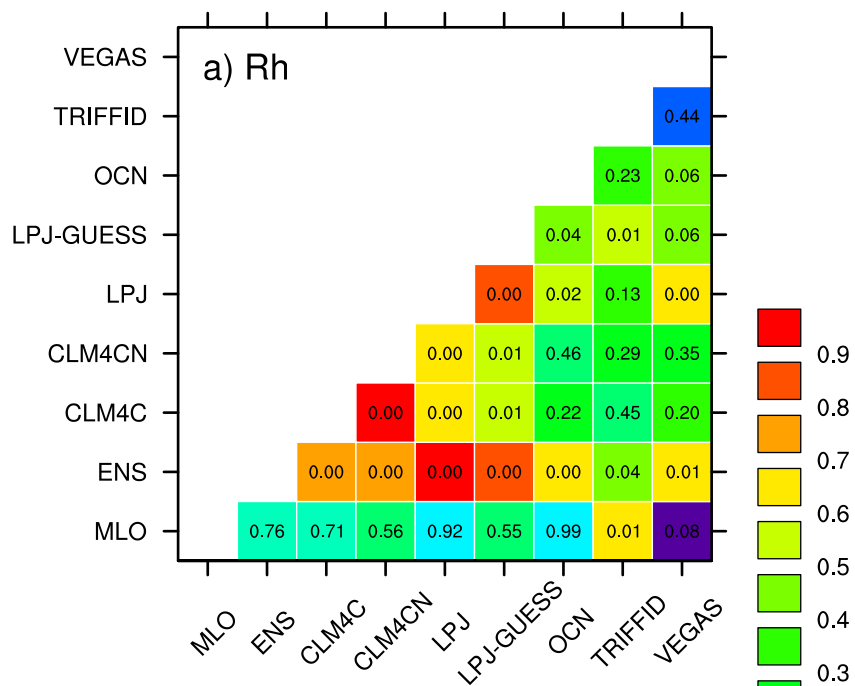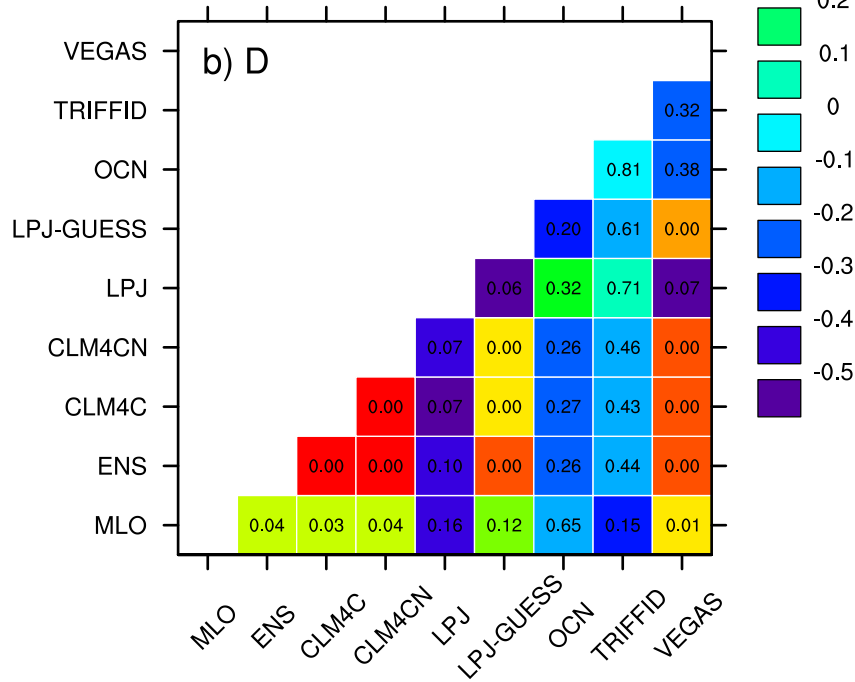

Supplement: Supplementary file 2 [file bg-13-2339-2016-supplement.zip]

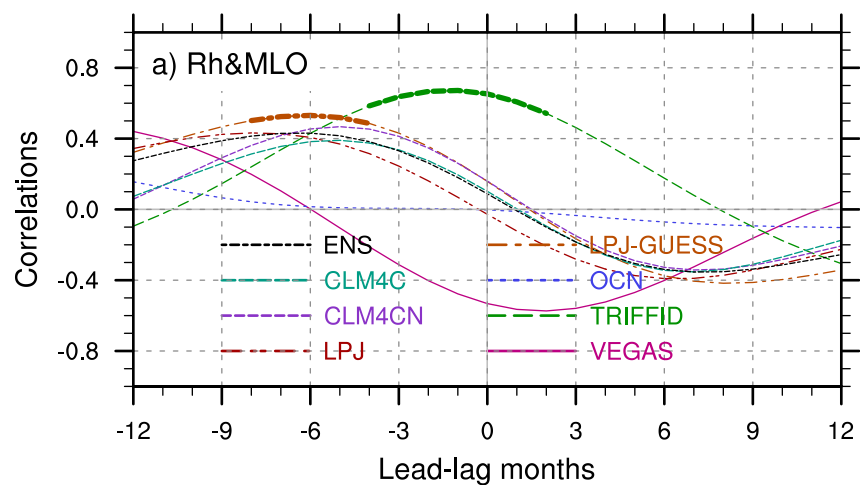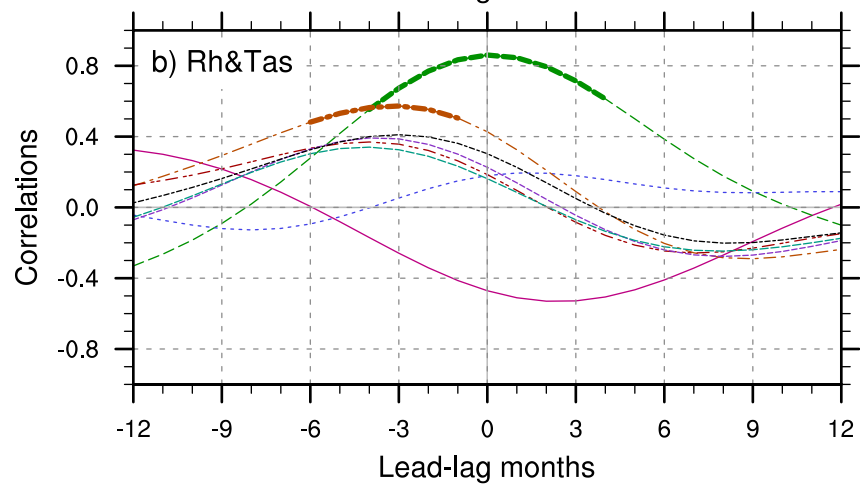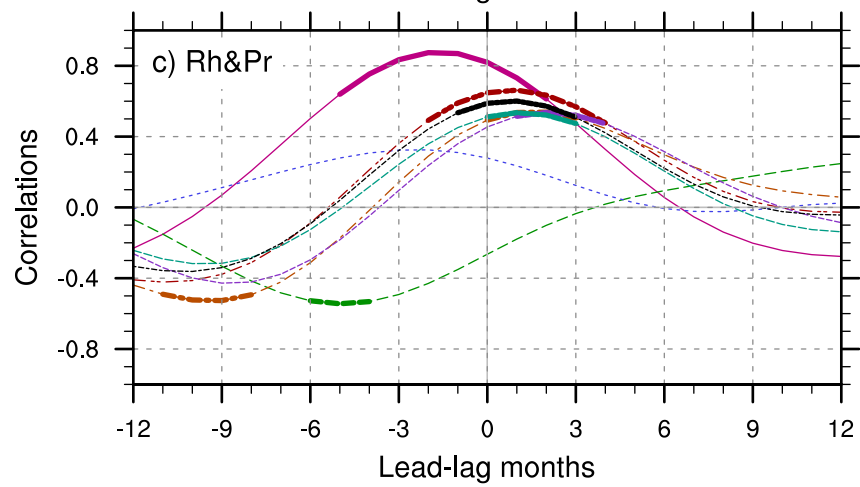

Supplement: Supplementary file 3 [file bg-13-2339-2016-supplement.zip]

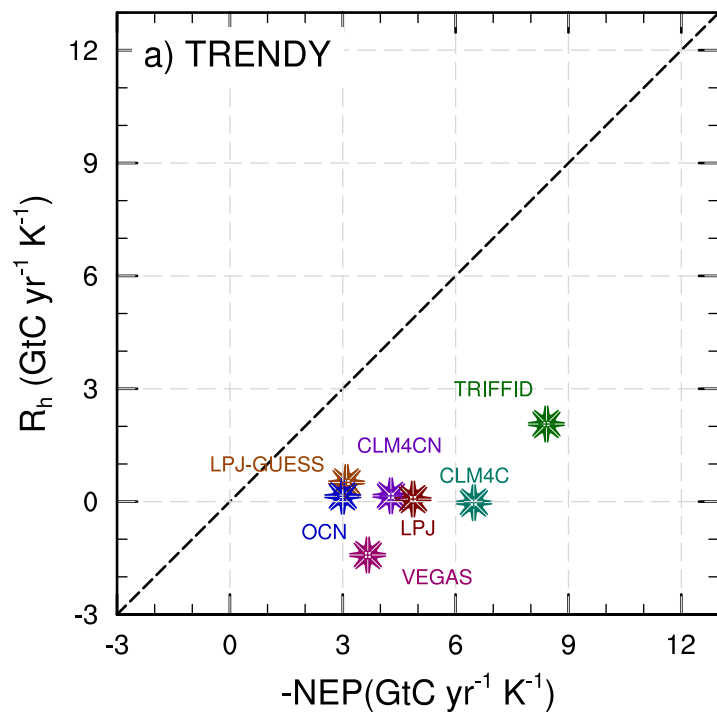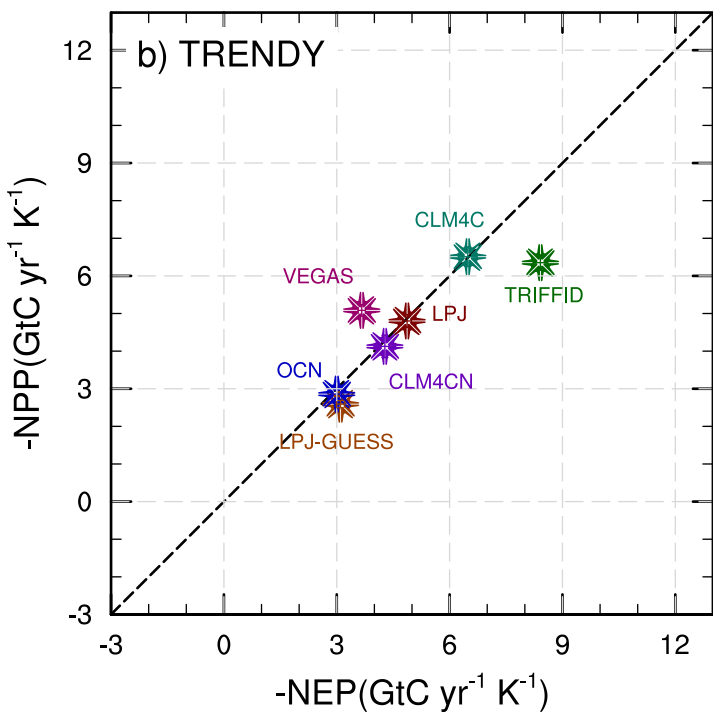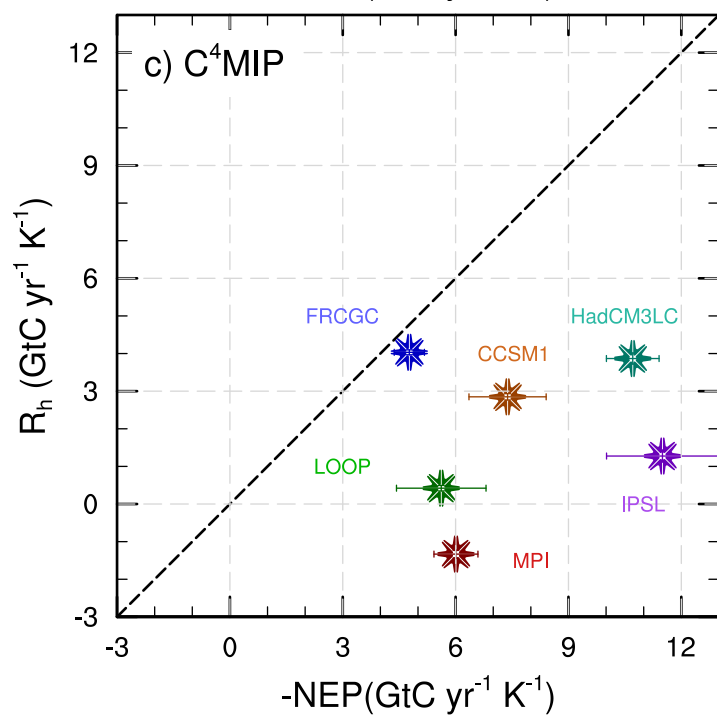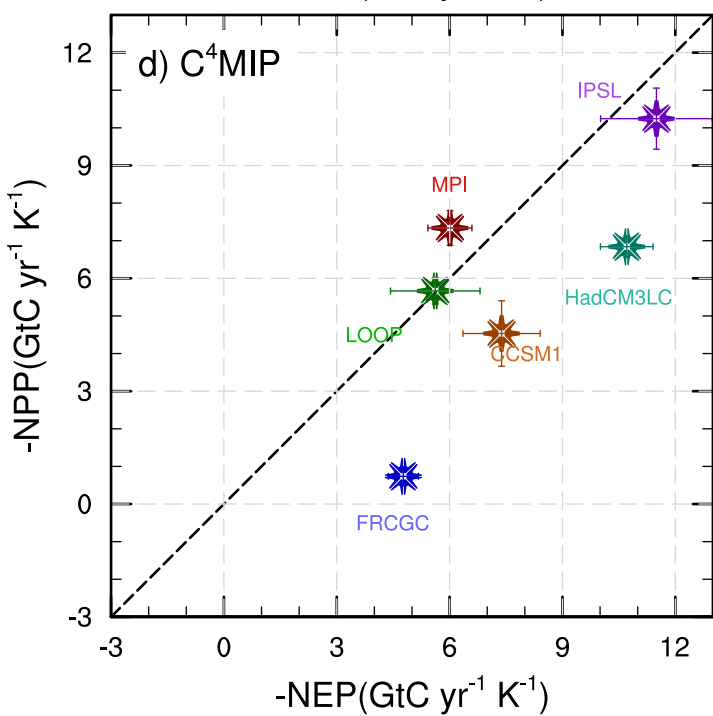

Supplement: Supplementary file 4 [file bg-13-2339-2016-supplement.zip]

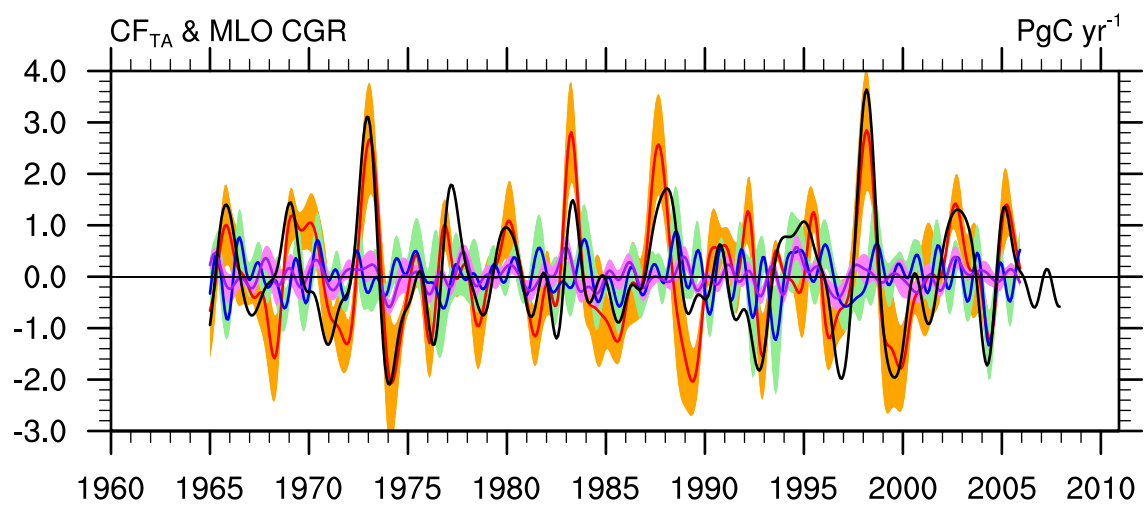

Supplement: Supplementary file 6 [file bg-13-2339-2016-supplement.zip]

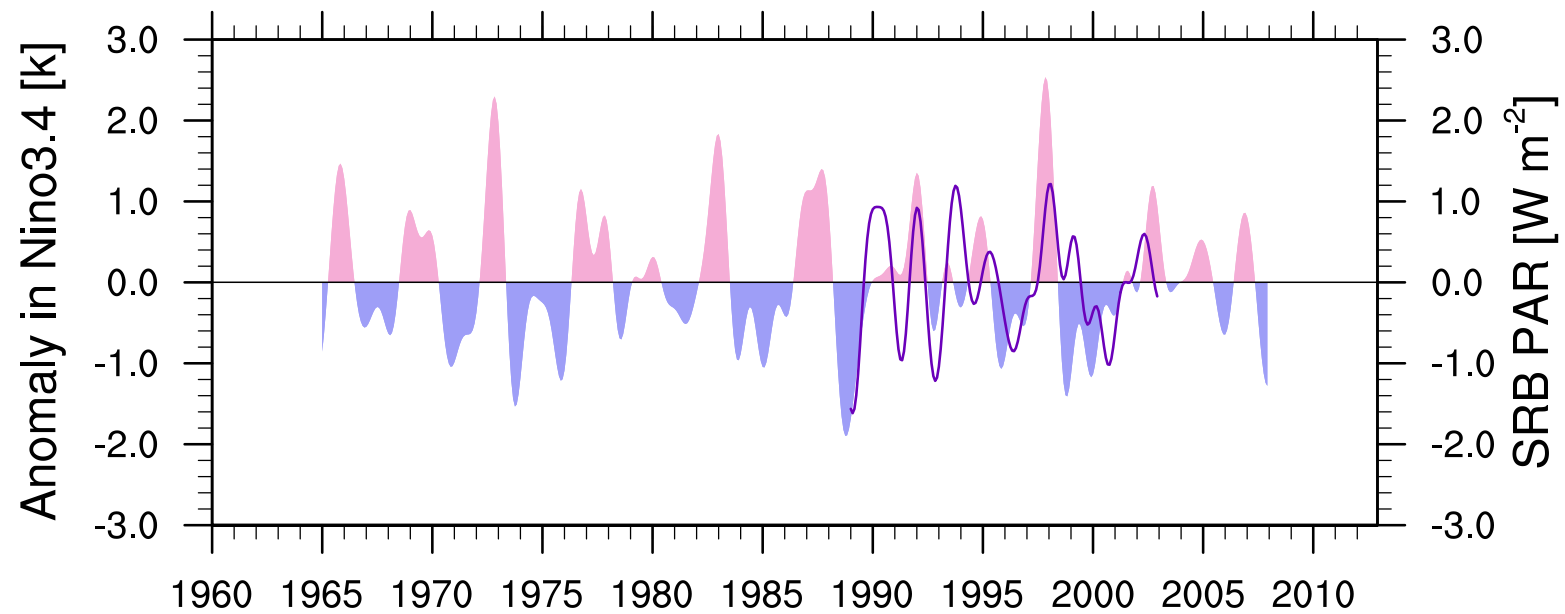

Supplement: Supplementary file 7 [file bg-13-2339-2016-supplement.zip]
